# Supplementary material for: Persistent Regional Income Inequalities in Kenya During the COVID-19 Pandemic: Evidence from a Bi-Dimensional Inequality Decomposition Analysis
Source: Research Square preprint supplement (doi:10.21203/rs.3.rs-5101160/v1), 2024-12-25
Supplement: Supplementary file 1 [file 7446d67404d0a5e7d3939651.docx]

**Table 1: Descriptive statistics of per capita GDP, 1,000 KES (n=47)**

| Year | Min | Median | Max | Mean | CV | Skewness | Outliers |
| --- | --- | --- | --- | --- | --- | --- | --- |
| 2019 | 45.2 | 107.0 | 472.2 | 123.6 | 0.57 | 2.96 | MM, NB |
| 2020 | 46.9 | 106.8 | 456.5 | 122.1 | 0.56 | 2.89 | MM, NB |
| 2021 | 54.9 | 120.0 | 537.9 | 139.2 | 0.57 | 3.05 | MM, NB |
| AGR | 0.9 | 31.1 | 109.0 | 37.7 | 0.62 | 1.22 | NN, EM |
| MIN | 0.1 | 0.5 | 8.6 | 1.2 | 1.38 | 2.82 | KW, MC |
| MAN | 0.9 | 4.8 | 52.5 | 8.0 | 1.41 | 2.88 | MM, NB |
| EGW | 0.4 | 0.9 | 21.9 | 2.9 | 1.72 | 2.97 | MB, EB, NK |
| CNS | 0.4 | 3.5 | 43.1 | 6.5 | 1.31 | 2.74 | NB, MM |
| THE | 1.0 | 5.6 | 73.9 | 10.3 | 1.20 | 3.41 | NB, MM |
| TIC | 2.1 | 13.6 | 86.2 | 17.5 | 0.93 | 2.96 | NB, MM |
| FBS | 2.0 | 6.6 | 166.6 | 13.2 | 1.87 | 5.43 | NB |
| OSV | 18.1 | 24.9 | 42.5 | 26.4 | 0.22 | 0.95 | NB, LM |

Note: Outliers if the standardized values exceed the absolute value of 2.5.

**Appendix Table 1: List of counties and regional classification**

| Province | Region | HASC  Code | County |  | Province | Region | HASC  Code | County |
| --- | --- | --- | --- | --- | --- | --- | --- | --- |
| Central | Central (6) | NN | Nyandarua |  | Western | Nyanza Western (10) | KK | Kakamega |
| NI | Nyeri |  | VI | Vihiga |
| KY | Kirinyaga |  | BN | Bungoma |
| MU | Muranga |  | Nyanza | BS | Busia |
| KB | Kiambu |  | SI | Siaya |
| Nairobi | NB | Nairobi |  | KU | Kisumu |
| Eastern | Eastern (8) | MB | Marsabit |  | HB | Homa Bay |
| IS | Isiolo |  | MG | Migori |
| ME | Meru |  | KI | Kisii |
| NT | Tharaka Nithi |  | NM | Nyamira |
| EB | Embu |  | Rift Valley | Rift Valley (14) | TU | Turkana |
| KT | Kitui |  | WP | West Pokot |
| MC | Machakos |  | SA | Samburu |
| MK | Makueni |  | TN | Trans Nzoia |
| Coast | North Coast (9) | MM | Mombasa |  | UG | Uasin-Gishu |
| KW | Kwale |  | EM | Elgeyo Marakwet |
| KF | Kilifi |  | ND | Nandi |
| TR | Tana River |  | BA | Baringo |
| LM | Lamu |  | LK | Laikipia |
| TT | Taita Taveta |  | NK | Nakuru |
| North-Eastern | GA | Garissa |  | NR | Narok |
| WJ | Wajir |  | KJ | Kajiado |
| MD | Mandera |  | KR | Kericho |
|  |  |  |  |  | BO | Bomet |

**HASC indicates the hierarchical administrative subdivision codes.**
